# Supplementary material for: Comparison of Antibiofilm Activity of Pseudomonas aeruginosa Phages on Isolates from Wounds of Diabetic and Non-Diabetic Patients
Source: MDPI journal article supplement (doi:10.3390/microorganisms11092230), 2023-09-04
Supplement: s1 [file s1]

**Table S1: Antimicrobial susceptibility of the bacterial isolates used in this study.** Represented as zone of inhibition in mm (R/S/I). R : Resistant ; I :Intermediate ; S Susceptible.

| SOURCE OF ISOLATES  | ISOLATES   | ANTIBIOTICS     |        |       |       |                |       |       |           |                           |       |                  |       |            |
|---------------------|------------|-----------------|--------|-------|-------|----------------|-------|-------|-----------|---------------------------|-------|------------------|-------|------------|
|                     |            | Aminoglycosides |        |       |       | Cephalosporins |       |       | Cabapenem | Betalactum with inhibitor |       | Fluoroquinolones |       | Monobactam |
|                     |            | Gen             | TOB    | AK    | NET   | CPZ            | CAZ   | CFS   | IPM       | PI                        | PIT   | LE               | CIP   | AT         |
| Standard culture    | ATCC 27853 | 24 (S)          | 32(S)  | 18(S) | 26(S) | 29 (S)         | 27(S) | 24(S) | 27(S)     | 23 (S)                    | 27(S) | 31(S)            | 20(S) | 27(S)      |
| Diabetic wounds     | ADWS6      | R               | 15( R) | R     | 22(S) | 22(S)          | 25(S) | 21(I) | 28(S)     | 16(I)                     | 25(S) | R                | R     | 28(S)      |
|                     | ADWS 9     | R               | 10(R)  | 10(R) | 20(S) | 21(S)          | 20(I) | 17(I) | 25(S)     | 17(I)                     | 22(S) | R                | R     | 25(S)      |
|                     | ADWS 10    | 9(R)            | 20(S)  | 16(I) | R     | R              | 14(R) | R     | 15(R)     | R                         | 16(I) | 21(S)            | 15(S) | 15(R)      |
|                     | ADWS 11    | R               | 20(I)  | R     | R     | R              | R     | R     | R         | R                         | R     | 16(I)            | R     | R          |
|                     | ADWS 14    | 13(I)           | 30(S)  | R     | 20(S) | 20(I)          | 22(S) | 21(I) | 26(S)     | R                         | 21(S) | 19(S)            | 23(S) | 26(S)      |
|                     | ADWS 17    | 21(S)           | 35(S)  | 20(S) | 13(R) | R              | 15(I) | 13(R) | 24(S)     | R                         | 20(I) | 29(S)            | 23(S) | 24(S)      |
|                     | ADWS 23    | 22(S)           | 33(S)  | 17(S) | 20(S) | 16(I)          | 19(I) | 15(R) | 21(S)     | 16(I)                     | 21(S) | 29(S)            | 23(S) | 21(S)      |
|                     | ADWS 28    | 23(S)           | 28(S)  | 21(S) | 25(S) | 26(S)          | 26(S) | 24(S) | 23(S)     | 25(S)                     | 23(S) | 34(S)            | 26(S) | 23(S)      |
|                     | ADWS 36    | R               | 32(S)  | R     | 33(S) | 24(S)          | 21(S) | 30(S) | 15(R)     | 28(S)                     | 26(S) | R                | 32(S) | 15(R)      |
|                     | ADWS 44    | R               | 17(I)  | 23(S) | 28(S) | R              | 28(S) | R     | 27(S)     | R                         | 20(I) | R                | 28(S) | 27(S)      |
|                     | ADWS 46    | 30(S)           | 11(R)  | 25(S) | 20(S) | R              | 27(S) | 21(I) | 27(S)     | 24(S)                     | 31(S) | 25(S)            | 24(S) | 27(S)      |
|                     | ADWS 47    | 25(S)           | 13(R)  | 20(S) | 10(R) | 11(R)          | 20(I) | 14(R) | 20(S)     | R                         | 24(S) | 21(S)            | 20(S) | 20(S)      |
|                     | ADWS 55    | 20(S)           | 40(S)  | 23(S) | 24(S) | 20(I)          | 22(S) | 24(S) | 21(S)     | 26(S)                     | 24(S) | 27(S)            | 22(S) | 21(S)      |
|                     | ADWS 58    | 12(R)           | 21(S)  | 18(S) | 21(S) | 25(S)          | 23(S) | 14(R) | 23(S)     | 22(S)                     | 31(S) | R                | 22(S) | 23(S)      |
|                     | ADWS 62    | 25(S)           | 31(S)  | 24(S) | 24(S) | 25(S)          | 24(S) | 20(I) | 24(S)     | 27(S)                     | 21(S) | 22(S)            | 21(S) | 24(S)      |
|                     | ADWS 66    | 21(S)           | R      | 25(S) | 19(S) | R              | 28(S) | 20(I) | 28(S)     | 21(S)                     | R     | R                | 23(S) | 28(S)      |
| Non-diabetic wounds | ADWS 4     | 18(S)           | 35(S)  | 18(S) | 26(S) | 25(S)          | 25(S) | 25(S) | 30(S)     | 21(S)                     | 26(S) | 30(S)            | 22(S) | 30(S)      |
|                     | ADWS 8     | 23(S)           | 33(S)  | 22(S) | 18(S) | 23(S)          | 17(I) | 16(I) | 22(S)     | 20(I)                     | 17(I) | 35(S)            | 24(S) | 22(S)      |
|                     | ADWS 13    | 22(S)           | 31(S)  | 20(S) | 22(S) | 29(S)          | 20(I) | 16(I) | 25(S)     | 20(I)                     | 21(S) | 30(S)            | 21(S) | 25(S)      |
|                     | ADWS 15    | 21(S)           | 40(S)  | 22(S) | 25(S) | 20(I)          | 17(I) | 17(I) | 24(S)     | 15(I)                     | 19(I) | 32(S)            | 22(S) | 24(S)      |
|                     | ADWS 16    | 14(I)           | 17(I)  | 10(R) | R     | R              | 10(R) | R     | 8(R)      | R                         | 10(R) | R                | R     | 8(R)       |
|                     | ADWS 21    | 21(S)           | 26(S)  | 15(I) | 22(S) | 18(I)          | 25(S) | 21(I) | 21(S)     | 20(I)                     | 23(S) | 30(S)            | 22(S) | 21(S)      |

|             |         |       |       |       |       |        |       |       |         |        |       |       |       |       |
|-------------|---------|-------|-------|-------|-------|--------|-------|-------|---------|--------|-------|-------|-------|-------|
|             | ADWS 25 | 26(S) | 32(S) | 10(R) | R     | R      | 11(R) | R     | R       | R      | R     | 21(S) | 31(S) | R     |
|             | ADWS 30 | 25(S) | 26(S) | 20(S) | 15(I) | 21(S)  | 25(S) | 24(S) | 15(R)   | 30(S)  | 27(S) | 35(S) | 16(S) | 15(R) |
|             | ADWS 34 | 25(S) | 24(S) | 26(S) | 21(S) | 23(S)  | 22(S) | 15(R) | 30(S)   | 25(S)  | 25(S) | 36(S) | 21(S) | 30(S) |
|             | ADWS 38 | 20(S) | 36(S) | 22(S) | 30(S) | R      | 26(S) | 16(I) | 24(S)   | 32(S)  | R     | 25(S) | 20(S) | 24(S) |
|             | ADWS 40 | 11(R) | 10(R) | 10(R) | R     | 28(S)  | 12(R) | 17(I) | 7(R)    | 25(S)  | 16(I) | R     | R     | 7(R)  |
|             | ADWS 41 | 16(S) | 11(R) | 14(R) | R     | 30(S)  | 30(S) | 19(I) | 11(R)   | 28(S)  | R     | R     | R     | 11(R) |
|             | ADWS 43 | 25(S) | 32(S) | 21(S) | R     | 31(S)  | 29(S) | 16(I) | 24(S)   | 38(S)  | 28(S) | 26(S) | 21(S) | 24(S) |
|             | ADWS 50 | 18(S) | 22(S) | 18(S) | 20(S) | 24(S)  | 28(S) | 21(I) | 21(S)   | 22(S)  | 25(S) | 23(S) | 18(S) | 21(S) |
|             | ADWS 51 | 27(S) | 25(S) | 22(S) | 20(S) | 24(S)  | 30(S) | 15(R) | 30(S)   | 21(S)  | R     | 24(S) | 22(S) | 30(S) |
|             | ADWS 52 | 10(R) | 18(I) | 18(S) | 25(S) | 17(I)  | 11(R) | R     | 12 ( R) | 22(S)  | 16(I) | R     | 23(S) | 22(S) |
|             | ADWS 53 | 31(S) | R     | 15(I) | R     | 23(S)  | 10(R) | R     | 11(R)   | 21(S)  | 8(R)  | 15(I) | 16(S) | 11(R) |
|             | ADWS 54 | 32(S) | 12(R) | 15(I) | 26(S) | 18(I)  | 22(S) | 10(R) | 10(R)   | R      | R     | 15(I) | 15(S) | 10(R) |
|             | ADWS 56 | 26(S) | 37(S) | 23(S) | 18(S) | 21(S)  | 13(R) | 21(I) | 26(S)   | 26(S)  | 26(S) | 24(S) | 23(S) | 26(S) |
|             |         |       |       |       |       |        |       |       |         |        |       |       |       |       |
| Environment | AMO1    | 24(S) | 32(S) | 21(S) | 28(S) | 32 (S) | 27(S) | 25(S) | 27(S)   | 26 (S) | 27(S) | 33(S) | 23(S) | 28(S) |
|             | JMO2    | 24(S) | 32(S) | 21(S) | 28(S) | 28 (S) | 27(S) | 25(S) | 27(S)   | 26 (S) | 27(S) | 33(S) | 23(S) | 28(S) |
|             | VMO2    | 24(S) | 32(S) | 21(S) | 28(S) | 27 (S) | 27(S) | 25(S) | 27(S)   | 26 (S) | 27(S) | 33(S) | 23(S) | 28(S) |
|             | VMO1    | 24(S) | 32(S) | 21(S) | 28(S) | 31 (S) | 27(S) | 25(S) | 27(S)   | 26 (S) | 27(S) | 33(S) | 23(S) | 28(S) |
|             | P-a1    | 24(S) | 32(S) | 21(S) | 28(S) | 30 (S) | 27(S) | 25(S) | 27(S)   | 26 (S) | 27(S) | 33(S) | 23(S) | 28(S) |
|             | JPA1    | 24(S) | 32(S) | 21(S) | 28(S) | 32 (S) | 27(S) | 25(S) | 27(S)   | 26 (S) | 27(S) | 33(S) | 23(S) | 28(S) |
|             | FTOA    | 26(S) | 22(S) | 23(S) | 20(S) | 21(S)  | 28(S) | 25(S) | 26(S)   | 26(S)  | 25(S) | 24(S) | 18(S) | 26(S) |
|             | FO1     | 24(S) | 32(S) | 21(S) | 28(S) | 32 (S) | 27(S) | 25(S) | 27(S)   | 26 (S) | 27(S) | 33(S) | 23(S) | 28(S) |
|             | VAO1A   | 24(S) | 32(S) | 21(S) | 28(S) | 28 (S) | 27(S) | 25(S) | 27(S)   | 26 (S) | 27(S) | 33(S) | 23(S) | 28(S) |
|             | NOA     | 24(S) | 32(S) | 21(S) | 28(S) | 32 (S) | 27(S) | 25(S) | 27(S)   | 26 (S) | 27(S) | 33(S) | 23(S) | 28(S) |
|             | VAO1B   | 24(S) | 32(S) | 21(S) | 28(S) | 29(S)  | 27(S) | 25(S) | 27(S)   | 26 (S) | 27(S) | 33(S) | 23(S) | 28(S) |
|             | FTOC    | 24(S) | 32(S) | 21(S) | 28(S) | 32 (S) | 27(S) | 25(S) | 27(S)   | 26 (S) | 27(S) | 33(S) | 23(S) | 28(S) |
|             | FTO1a   | 24(S) | 32(S) | 21(S) | 28(S) | 32 (S) | 27(S) | 25(S) | 27(S)   | 26 (S) | 27(S) | 33(S) | 23(S) | 28(S) |
|             | FLO1    | 24(S) | 32(S) | 21(S) | 28(S) | 32 (S) | 27(S) | 25(S) | 27(S)   | 26 (S) | 27(S) | 33(S) | 23(S) | 28(S) |
|             | FLO2    | 24(S) | 32(S) | 21(S) | 28(S) | 32 (S) | 27(S) | 25(S) | 27(S)   | 26 (S) | 27(S) | 33(S) | 23(S) | 28(S) |
|             | FO2     | 24(S) | 32(S) | 21(S) | 28(S) | 32 (S) | 27(S) | 25(S) | 27(S)   | 26 (S) | 27(S) | 33(S) | 23(S) | 28(S) |

|  |      |       |       |       |       |        |       |       |       |        |       |       |       |       |
|--|------|-------|-------|-------|-------|--------|-------|-------|-------|--------|-------|-------|-------|-------|
|  | SO1  | 24(S) | 34(S) | 21(S) | 24(S) | 32 (S) | 22(S) | 24(S) | 27(S) | 26 (S) | 24(S) | 33(S) | 22(S) | 28(S) |
|  | SO2  | 24(S) | 32(S) | 21(S) | 28(S) | 32 (S) | 27(S) | 25(S) | 27(S) | 26 (S) | 27(S) | 33(S) | 23(S) | 28(S) |
|  | JPO1 | 24(S) | 32(S) | 21(S) | 28(S) | 32 (S) | 27(S) | 25(S) | 27(S) | 26 (S) | 27(S) | 33(S) | 23(S) | 28(S) |

**Table S2: Antibiofilm activity of the phages on isolates from different sources.** Values displayed in mean absorbance at 570nm  $\pm$  standard deviation

|                             |        | Control           | Pa1               | Pa3               | Pa6               | Pa7               | Pa9               | Pa10              | Pa14              | Pa15              | Pa18              |
|-----------------------------|--------|-------------------|-------------------|-------------------|-------------------|-------------------|-------------------|-------------------|-------------------|-------------------|-------------------|
|                             | PAO1   | 0.494 $\pm$ 0.023 | 0.232 $\pm$ 0.094 | 0.278 $\pm$ 0.075 | 0.328 $\pm$ 0.059 | 0.271 $\pm$ 0.051 | 0.158 $\pm$ 0.008 | 0.215 $\pm$ 0.008 | 0.164 $\pm$ 0.006 | 0.257 $\pm$ 0.008 | 0.256 $\pm$ 0.019 |
| Non-diabetic wound isolates | ADWS04 | 1.134 $\pm$ 0.009 | 0.346 $\pm$ 0.067 | 0.208 $\pm$ 0.069 | 0.605 $\pm$ 0.025 | 0.259 $\pm$ 0.068 | 0.191 $\pm$ 0.006 | 0.190 $\pm$ 0.006 | 0.158 $\pm$ 0.013 | 0.286 $\pm$ 0.006 | 0.157 $\pm$ 0.007 |
|                             | ADWS08 | 0.942 $\pm$ 0.113 | 0.346 $\pm$ 0.081 | 0.857 $\pm$ 0.102 | 0.391 $\pm$ 0.069 | 0.482 $\pm$ 0.056 | 0.774 $\pm$ 0.039 | 0.548 $\pm$ 0.040 | 0.424 $\pm$ 0.008 | 0.301 $\pm$ 0.035 | 0.379 $\pm$ 0.014 |
|                             | ADWS13 | 0.512 $\pm$ 0.071 | 0.257 $\pm$ 0.028 | 0.182 $\pm$ 0.020 | 0.152 $\pm$ 0.011 | 0.208 $\pm$ 0.022 | R                 | 0.146 $\pm$ 0.004 | 0.177 $\pm$ 0.007 | 0.174 $\pm$ 0.006 | 0.156 $\pm$ 0.004 |
|                             | ADWS15 | 1.464 $\pm$ 0.213 | 0.366 $\pm$ 0.068 | 0.287 $\pm$ 0.065 | 0.323 $\pm$ 0.044 | 0.219 $\pm$ 0.021 | 0.844 $\pm$ 0.043 | 0.184 $\pm$ 0.007 | 0.137 $\pm$ 0.008 | 0.299 $\pm$ 0.008 | 0.354 $\pm$ 0.039 |
|                             | ADWS16 | 0.929 $\pm$ 0.037 | 0.829 $\pm$ 0.084 | 0.279 $\pm$ 0.026 | 0.647 $\pm$ 0.077 | 0.663 $\pm$ 0.047 | 0.38 $\pm$ 0.005  | 0.407 $\pm$ 0.005 | 0.4 $\pm$ 0.046   | 0.49 $\pm$ 0.047  | R                 |
|                             | ADWS21 | 1.428 $\pm$ 0.064 | 0.924 $\pm$ 0.060 | 0.243 $\pm$ 0.049 | 0.144 $\pm$ 0.025 | R                 | 0.282 $\pm$ 0.026 | 0.159 $\pm$ 0.017 | 0.216 $\pm$ 0.008 | 0.195 $\pm$ 0.007 | 0.231 $\pm$ 0.008 |
|                             | ADWS25 | 0.716 $\pm$ 0.051 | 0.634 $\pm$ 0.027 | 0.481 $\pm$ 0.037 | 0.339 $\pm$ 0.031 | R                 | 0.479 $\pm$ 0.016 | 0.386 $\pm$ 0.008 | 0.447 $\pm$ 0.023 | 0.258 $\pm$ 0.023 | R                 |
|                             | ADWS30 | 1.021 $\pm$ 0.080 | R                 | 0.484 $\pm$ 0.071 | 0.339 $\pm$ 0.070 | 0.545 $\pm$ 0.047 | R                 | 0.375 $\pm$ 0.009 | R                 | 0.382 $\pm$ 0.04  | 0.343 $\pm$ 0.007 |
|                             | ADWS34 | 0.459 $\pm$ 0.059 | 0.404 $\pm$ 0.057 | 0.385 $\pm$ 0.034 | 0.286 $\pm$ 0.030 | 0.349 $\pm$ 0.030 | 0.369 $\pm$ 0.006 | 0.402 $\pm$ 0.048 | 0.33 $\pm$ 0.007  | 0.346 $\pm$ 0.036 | 0.386 $\pm$ 0.017 |
|                             | ADWS38 | 0.451 $\pm$ 0.036 | 0.216 $\pm$ 0.074 | 0.075 $\pm$ 0.003 | 0.057 $\pm$ 0.003 | 0.072 $\pm$ 0.005 | 0.143 $\pm$ 0.009 | 0.081 $\pm$ 0.009 | 0.254 $\pm$ 0.011 | 0.161 $\pm$ 0.021 | 0.078 $\pm$ 0.011 |
|                             | ADWS40 | 1.072 $\pm$ 0.168 | 0.525 $\pm$ 0.053 | 0.483 $\pm$ 0.031 | 0.448 $\pm$ 0.044 | 0.336 $\pm$ 0.018 | 1.029 $\pm$ 0.115 | 0.571 $\pm$ 0.049 | 0.456 $\pm$ 0.009 | 0.445 $\pm$ 0.041 | 0.448 $\pm$ 0.007 |
|                             | ADWS41 | 0.940 $\pm$ 0.049 | 0.192 $\pm$ 0.060 | 0.083 $\pm$ 0.003 | 0.557 $\pm$ 0.007 | 0.526 $\pm$ 0.065 | 0.086 $\pm$ 0.011 | 0.298 $\pm$ 0.015 | 0.312 $\pm$ 0.005 | 0.345 $\pm$ 0.017 | 0.624 $\pm$ 0.008 |
|                             | ADWS43 | 0.782 $\pm$ 0.041 | R                 | 0.605 $\pm$ 0.073 | R                 | 0.395 $\pm$ 0.057 | 0.483 $\pm$ 0.051 | 0.306 $\pm$ 0.032 | 0.369 $\pm$ 0.008 | 0.328 $\pm$ 0.009 | 0.282 $\pm$ 0.013 |
|                             | ADWS50 | 1.109 $\pm$ 0.05  | 0.415 $\pm$ 0.043 | 0.358 $\pm$ 0.032 | 0.633 $\pm$ 0.008 | 0.331 $\pm$ 0.007 | 0.358 $\pm$ 0.006 | 0.551 $\pm$ 0.026 | 0.349 $\pm$ 0.006 | 0.392 $\pm$ 0.016 | 0.581 $\pm$ 0.030 |
|                             | ADWS51 | 0.353 $\pm$ 0.015 | R                 | 0.239 $\pm$ 0.008 | 0.166 $\pm$ 0.003 | 0.185 $\pm$ 0.011 | 0.183 $\pm$ 0.015 | 0.185 $\pm$ 0.008 | 0.196 $\pm$ 0.006 | 0.198 $\pm$ 0.007 | 0.18025           |
|                             | ADWS53 | 0.743 $\pm$ 0.041 | R                 | 0.694 $\pm$ 0.057 | 0.281 $\pm$ 0.009 | 0.225 $\pm$ 0.025 | 0.549 $\pm$ 0.042 | 0.355 $\pm$ 0.04  | 0.272 $\pm$ 0.028 | 0.253 $\pm$ 0.028 | 0.232 $\pm$ 0.021 |
|                             | ADWS54 | 0.765 $\pm$ 0.047 | 0.699 $\pm$ 0.033 | R                 | R                 | 0.569 $\pm$ 0.012 | R                 | 0.501 $\pm$ 0.070 | 0.533 $\pm$ 0.037 | 0.511 $\pm$ 0.048 | 0.667 $\pm$ 0.015 |
|                             | ADWS56 | 1.169 $\pm$ 0.057 | 0.877 $\pm$ 0.068 | 0.530 $\pm$ 0.066 | 0.261 $\pm$ 0.017 | 0.332 $\pm$ 0.07  | 0.267 $\pm$ 0.031 | 0.370 $\pm$ 0.017 | 0.346 $\pm$ 0.018 | 0.337 $\pm$ 0.009 | 0.339 $\pm$ 0.037 |
| Diabetic wound isolates     | ADWS06 | 0.911 $\pm$ 0.046 | 0.307 $\pm$ 0.011 | 0.261 $\pm$ 0.007 | 0.272 $\pm$ 0.006 | 0.251 $\pm$ 0.006 | 0.218 $\pm$ 0.006 | 0.219 $\pm$ 0.007 | 0.265 $\pm$ 0.019 | 0.253 $\pm$ 0.025 | 0.229 $\pm$ 0.017 |
|                             | ADWS09 | 0.884 $\pm$ 0.018 | R                 | 0.357 $\pm$ 0.036 | R                 | R                 | R                 | R                 | 0.273 $\pm$ 0.035 | R                 | R                 |
|                             | ADWS10 | 0.69 $\pm$ 0.031  | 0.606 $\pm$ 0.061 | 0.604 $\pm$ 0.067 | R                 | R                 | R                 | 0.412 $\pm$ 0.033 | 0.306 $\pm$ 0.036 | 0.196 $\pm$ 0.006 | R                 |
|                             | ADSW11 | 0.616 $\pm$ 0.045 | 0.153 $\pm$ 0.005 | 0.027 $\pm$ 0.002 | 0.358 $\pm$ 0.034 | R                 | 0.147 $\pm$ 0.007 | 0.174 $\pm$ 0.012 | 0.083 $\pm$ 0.011 | 0.117 $\pm$ 0.013 | 0.374 $\pm$ 0.016 |
|                             | ADWS14 | 0.778 $\pm$ 0.050 | 0.510 $\pm$ 0.019 | 0.371 $\pm$ 0.007 | 0.267 $\pm$ 0.007 | 0.382 $\pm$ 0.032 | 0.177 $\pm$ 0.016 | 0.179 $\pm$ 0.004 | 0.173 $\pm$ 0.004 | 0.213 $\pm$ 0.029 | R                 |
|                             | ADWS17 | 1.113 $\pm$ 0.109 | 0.156 $\pm$ 0.009 | 0.257 $\pm$ 0.011 | 0.164 $\pm$ 0.014 | 0.312 $\pm$ 0.007 | 0.238 $\pm$ 0.011 | 0.296 $\pm$ 0.006 | 0.194 $\pm$ 0.006 | 0.235 $\pm$ 0.014 | 0.206 $\pm$ 0.027 |
|                             | ADWS23 | 0.937 $\pm$ 0.025 | 0.479 $\pm$ 0.054 | 0.199 $\pm$ 0.009 | 0.243 $\pm$ 0.005 | 0.208 $\pm$ 0.024 | 0.192 $\pm$ 0.007 | 0.164 $\pm$ 0.013 | 0.188 $\pm$ 0.023 | 0.244 $\pm$ 0.023 | 0.212 $\pm$ 0.004 |

|                        |        |               |               |                |               |               |               |               |               |               |               |
|------------------------|--------|---------------|---------------|----------------|---------------|---------------|---------------|---------------|---------------|---------------|---------------|
|                        | ADWS28 | 0.597 ± 0.037 | 0.500 ± 0.028 | 0.488 ± 0.028  | R             | R             | 0.309 ± 0.016 | 0.362 ± 0.007 | R             | R             | R             |
|                        | ADWS36 | 0.86 ± 0.015  | R             | R              | 0.461 ± 0.02  | R             | R             | 0.366 ± 0.007 | 0.34 ± 0.033  | 0.359 ± 0.040 | R             |
|                        | ADWS46 | 0.569 ± 0.011 | 0.488 ± 0.041 | 0.457 ± 0.041  | R             | 0.516 ± 0.063 | 0.496 ± 0.025 | 0.566 ± 0.05  | 0.477 ± 0.008 | 0.504 ± 0.006 | 0.471 ± 0.044 |
|                        | ADWS62 | 0.625 ± 0.061 | 0.332 ± 0.009 | 0.371 ± 0.029  | R             | R             | 0.308 ± 0.032 | R             | 0.358 ± 0.020 | 0.277 ± 0.008 | 0.211 ± 0.019 |
|                        | ADWS66 | 0.634 ± 0.017 | 0.181 ± 0.004 | 0.147 ± 0.004  | R             | R             | 0.289 ± 0.005 | 0.338 ± 0.009 | 0.301 ± 0.008 | R             | 0.307 ± 0.018 |
| Environmental Isolates | AMO1   | 0.471 ± 0.034 | 0.534 ± 0.027 | 0.286 ± 0.035  | 0.451 ± 0.034 | 0.255 ± 0.014 | 0.059 ± 0.003 | 0.054 ± 0.009 | 0.172 ± 0.011 | 0.492 ± 0.022 | 0.242 ± 0.013 |
|                        | JMO2   | 1.839 ± 0.042 | 0.472 ± 0.023 | 0.198 ± 0.025  | 0.174 ± 0.011 | 0.149 ± 0.022 | 0.112 ± 0.016 | 0.1 ± 0.002   | 0.104 ± 0.015 | 0.227 ± 0.041 | 0.185 ± 0.033 |
|                        | VMO2   | 0.681 ± 0.053 | 0.115 ± 0.012 | 0.335 ± 0.027  | 0.110 ± 0.019 | 0.278 ± 0.019 | 0.143 ± 0.011 | 0.120 ± 0.009 | 0.291 ± 0.021 | 0.137 ± 0.008 | 0.225 ± 0.046 |
|                        | VMO1   | 1.059 ± 0.056 | 0.343 ± 0.049 | 0.186 ± 0.007  | 0.098 ± 0.007 | 0.161 ± 0.022 | 0.128 ± 0.005 | 0.109 ± 0.010 | 0.364 ± 0.030 | 0.268 ± 0.005 | 0.156 ± 0.025 |
|                        | P-a1   | 1.249 ± 0.014 | 0.089 ± 0.009 | 0.251 ± 0.045  | 0.111 ± 0.009 | R             | 0.159 ± 0.018 | R             | R             | 0.125 ± 0.013 | 0.209 ± 0.028 |
|                        | FTOA   | 1.529 ± 0.039 | 0.1 ± 0.012   | 0.143 ± 0.016  | 0.164 ± 0.008 | R             | 0.189 ± 0.013 | R             | R             | 0.163 ± 0.012 | 0.163 ± 0.018 |
|                        | FO1    | 1.348 ± 0.039 | 0.117 ± 0.010 | 0.202 ± 0.014  | 0.224 ± 0.010 | R             | 0.184 ± 0.028 | R             | R             | 0.365 ± 0.036 | 0.220 ± 0.027 |
|                        | VAO1A  | 0.946 ± 0.039 | R             | 0.152 ± 0.021  | R             | R             | 0.141 ± 0.017 | R             | R             | 0.153 ± 0.016 | R             |
|                        | NOA    | 1.277 ± 0.048 | 0.231 ± 0.004 | 0.249 ± 0.096  | R             | R             | R             | R             | R             | 0.148 ± 0.017 | 0.167 ± 0.017 |
|                        | VAO1B  | 0.942 ± 0.017 | R             | R              | R             | R             | 0.174 ± 0.011 | 0.349 ± 0.020 | R             | R             | 0.206 ± 0.027 |
|                        | FTOC   | 1.544 ± 0.055 | R             | 0.271 ± 0.019  | R             | 0.154 ± 0.014 | 0.154 ± 0.015 | R             | R             | R             | 0.168 ± 0.012 |
|                        | FTO1a  | 1.303 ± 0.031 | 0.094 ± 0.008 | 0.270 ± 0.023  | R             | 0.387 ± 0.022 | 0.147 ± 0.015 | R             | R             | 0.164 ± 0.005 | 0.198 ± 0.013 |
|                        | FLO1   | 1.952 ± 0.05  | R             | R              | R             | R             | R             | R             | R             | 0.009 ± 0.003 | 0.018 ± 0.005 |
|                        | FLO2   | 0.449 ± 0.046 | R             | 0.047 ± 0.0013 | R             | 0.063 ± 0.007 | R             | R             | R             | R             | 0.034 ± 0.008 |
|                        | FO2    | 2.241 ± 0.030 | R             | 0.026 ± 0.006  | R             | 0.012 ± 0.007 | R             | 0.015 ± 0.008 | 0.023 ± 0.004 | R             | 0.058 ± 0.014 |
|                        | SO1    | 1.644 ± 0.028 | 0.118 ± 0.006 | 0.122 ± 0.014  | R             | 0.094 ± 0.014 | R             | R             | R             | R             | R             |
|                        | SO2    | 0.510 ± 0.006 | R             | 0.069 ± 0.006  | R             | 0.048 ± 0.005 | R             | R             | R             | R             | R             |
|                        | JPO1   | 1.581 ± 0.036 | R             | 1.101 ± 0.052  | R             | 0.310 ± 0.012 | 0.184 ± 0.005 | R             | R             | R             | 0.174 ± 0.013 |
